# Supplementary material for: The novel oligopeptide utilizing species Anaeropeptidivorans aminofermentans M3/9T, its role in anaerobic digestion and occurrence as deduced from large-scale fragment recruitment analyses
Source: Front Microbiol. 2022 Nov 9;13:1032515. doi: 10.3389/fmicb.2022.1032515 (PMC9682168; doi:10.3389/fmicb.2022.1032515)
Supplement: Supplementary file 3 [file Table_3.XLSX]

## Sheet: Tabelle1
Locus tag	KO numbeer	gene name	Putative gene product
KHILFOJJ_00126	K04072	adhE	acetaldehyde dehydrogenase / alcohol dehydrogenase [EC:1.2.1.10 / 1.1.1.1]
KHILFOJJ_00157	K02035		peptide/nickel transport system substrate-binding protein
KHILFOJJ_00198	K01752	sdaA	L-serine dehydratase [EC:4.3.1.17]
KHILFOJJ_00199	K01753	sdaA	L-serine dehydratase [EC:4.3.1.17]
KHILFOJJ_00203	K02033		peptide/nickel transport system permease protein
KHILFOJJ_00204	K02034		peptide/nickel transport system permease protein
KHILFOJJ_00205	K02031	ddpD	peptide/nickel transport system ATP-binding protein
KHILFOJJ_00207	K02035		peptide/nickel transport system substrate-binding protein
KHILFOJJ_00209	K01258	pepT	tripeptide aminopeptidase [EC:3.4.11.4]
KHILFOJJ_00226	K01999	livK	branched-chain amino acid transport system substrate-binding protein
KHILFOJJ_00227	K01997	livH	branched-chain amino acid transport system permease protein
KHILFOJJ_00228	K01998	livM	branched-chain amino acid transport system permease protein
KHILFOJJ_00229	K01995	livG	branched-chain amino acid transport system ATP-binding protein
KHILFOJJ_00230	K01996	livF	branched-chain amino acid transport system ATP-binding protein
KHILFOJJ_00248	K02033		peptide/nickel transport system permease protein
KHILFOJJ_00249	K02034		peptide/nickel transport system permease protein
KHILFOJJ_00250	K02031	ddpD	peptide/nickel transport system ATP-binding protein
KHILFOJJ_00251	K10823	oppF	oligopeptide transport system ATP-binding protein
KHILFOJJ_00279	K15580	oppA	oligopeptide transport system substrate-binding protein
KHILFOJJ_00280	K15581	oppB	oligopeptide transport system permease protein
KHILFOJJ_00281	K15582	oppC	oligopeptide transport system permease protein
KHILFOJJ_00282	K15583	oppD	oligopeptide transport system ATP-binding protein
KHILFOJJ_00283	K10823	oppF	oligopeptide transport system ATP-binding protein
KHILFOJJ_00331	K01999	livK	branched-chain amino acid transport system substrate-binding protein
KHILFOJJ_00332	K01997	livH	branched-chain amino acid transport system permease protein
KHILFOJJ_00333	K01998	livM	branched-chain amino acid transport system permease protein
KHILFOJJ_00334	K01995	livG	branched-chain amino acid transport system ATP-binding protein
KHILFOJJ_00335	K01996	livF	branched-chain amino acid transport system ATP-binding protein
KHILFOJJ_00344	K14155	patB	cysteine-S-conjugate beta-lyase [EC:4.4.1.13]
KHILFOJJ_00369	K02031	ddpD	peptide/nickel transport system ATP-binding protein
KHILFOJJ_00370	K10823	oppF	oligopeptide transport system ATP-binding protein
KHILFOJJ_00390	K08602	pep	oligoendopeptidase F [EC:3.4.24.-]
KHILFOJJ_00431	K00060	tdh	threonine 3-dehydrogenase [EC:1.1.1.103]
KHILFOJJ_00432	K00639	kbl	glycine C-acetyltransferase [EC:2.3.1.29]
KHILFOJJ_00442	K14155	patB	cysteine-S-conjugate beta-lyase [EC:4.4.1.13]
KHILFOJJ_00449	K02108	atpB	F-type H+-transporting ATPase subunit A
KHILFOJJ_00450	K02110	atpE	F-type H+-transporting ATPase subunit C
KHILFOJJ_00452	K02113	atpH	F-type H+-transporting ATPase subunit delta
KHILFOJJ_00453	K02111	atpA	F-type H+/Na+-transporting ATPase subunit alpha [EC:7.1.2.2 / 7.2.2.1]
KHILFOJJ_00454	K02115	atpG	F-type H+-transporting ATPase subunit gamma
KHILFOJJ_00455	K02112	atpG	F-type H+/Na+-transporting ATPase subunit beta [EC:7.1.2.2 / 7.2.2.1]
KHILFOJJ_00456	K02114	atpC	F-type H+-transporting ATPase subunit epsilon
KHILFOJJ_00490	K17077	artQ	arginine/lysine/histidine transport system permease protein
KHILFOJJ_00491	K23060	artM	arginine/lysine/histidine transport system ATP-binding protein [EC:7.4.2.1]
KHILFOJJ_00492	K13049		carboxypeptidase PM20D1 [EC:3.4.17.-]
KHILFOJJ_00497	K10672	grdB	glycine reductase complex component B subunit gamma [EC:1.21.4.2]
KHILFOJJ_00498	K10671	grdE	glycine reductase complex component B subunit alpha and beta [EC:1.21.4.2]
KHILFOJJ_00504	K07258	dac	serine-type D-Ala-D-Ala carboxypeptidase (penicillin-binding protein 5/6) [EC:3.4.16.4]
KHILFOJJ_00548	K02029		polar amino acid transport system permease protein
KHILFOJJ_00549	K02030		polar amino acid transport system substrate-binding protein
KHILFOJJ_00565	K02035		peptide/nickel transport system substrate-binding protein
KHILFOJJ_00566	K02033		peptide/nickel transport system permease protein
KHILFOJJ_00567	K02034		peptide/nickel transport system permease protein
KHILFOJJ_00568	K02034		peptide/nickel transport system permease protein
KHILFOJJ_00569	K02031	ddpD	peptide/nickel transport system ATP-binding protein
KHILFOJJ_00576	K02031	ddpD	peptide/nickel transport system ATP-binding protein
KHILFOJJ_00577	K02031	ddpD	peptide/nickel transport system ATP-binding protein
KHILFOJJ_00578	K15584	nikA	nickel transport system substrate-binding protein
KHILFOJJ_00590	K02035		peptide/nickel transport system substrate-binding protein
KHILFOJJ_00598	K02112	atpD	F-type H+/Na+-transporting ATPase subunit beta [EC:7.1.2.2 / 7.2.2.1]
KHILFOJJ_00599	K02115	atpG	F-type H+-transporting ATPase subunit gamma
KHILFOJJ_00600	K02111	atpA	F-type H+/Na+-transporting ATPase subunit alpha [EC:7.1.2.2 / 7.2.2.1]
KHILFOJJ_00601	K02113	atpH	F-type H+-transporting ATPase subunit delta
KHILFOJJ_00602	K02109	atpF	F-type H+-transporting ATPase subunit b
KHILFOJJ_00603	K02110	atpE	F-type H+-transporting ATPase subunit c
KHILFOJJ_00604	K02108	atpB	F-type H+-transporting ATPase subunit a
KHILFOJJ_00630	K01507	ppa	inorganic pyrophosphatase [EC:3.6.1.1]
KHILFOJJ_00719	K02035		peptide/nickel transport system substrate-binding protein
KHILFOJJ_00720	K02033		peptide/nickel transport system permease protein
KHILFOJJ_00721	K02034		peptide/nickel transport system permease protein
KHILFOJJ_00722	K02031	ddpD	peptide/nickel transport system ATP-binding protein
KHILFOJJ_00726	K02035		peptide/nickel transport system substrate-binding protein
KHILFOJJ_00742	K01295	cpg	glutamate carboxypeptidase [EC:3.4.17.11]
KHILFOJJ_00753	K00873	pyk	pyruvate kinase [EC:2.7.1.40]
KHILFOJJ_00766	K10671	grdE	glycine reductase complex component B subunit alpha and beta [EC:1.21.4.2]
KHILFOJJ_00767	K10672	grdB	glycine reductase complex component B subunit gamma [EC:1.21.4.2]
KHILFOJJ_00768	K10672	grdB	glycine reductase complex component B subunit gamma [EC:1.21.4.2]
KHILFOJJ_00769	K00384	trxB	thioredoxin reductase (NADPH) [EC:1.8.1.9]
KHILFOJJ_00770	K03671	trxA	thioredoxin
KHILFOJJ_00771	K10670	grdA	glycine/sarcosine/betaine reductase complex component A [EC:1.21.4.2 / 1.21.4.3 / 1.21.4.4]
KHILFOJJ_00772	K10670	grdA	glycine/sarcosine/betaine reductase complex component A [EC:1.21.4.2 / 1.21.4.3 / 1.21.4.4]
KHILFOJJ_00773	K21577	grdC	glycine/sarcosine/betaine reductase complex component C subunit beta [EC:1.21.4.2 / 1.21.4.3 / 1.21.4.4]
KHILFOJJ_00774	K21576	grdD	glycine/sarcosine/betaine reductase complex component C subunit alpha [EC:1.21.4.2 / 1.21.4.3 / 1.21.4.4]
KHILFOJJ_00821	K17992	hndB	NADP-reducing hydrogenase subunit HndB [EC:1.12.1.3]
KHILFOJJ_00822	K18331	hndC	NADP-reducing hydrogenase subunit HndC [EC:1.12.1.3]
KHILFOJJ_00823	K18332	hndD	NADP-reducing hydrogenase subunit HndD [EC:1.12.1.3]
KHILFOJJ_00877	K02110	atpE	F-type H+-transporting ATPase subunit c
KHILFOJJ_00881	K02111	atpA	F-type H+/Na+-transporting ATPase subunit alpha [EC:7.1.2.2 / 7.2.2.1]
KHILFOJJ_00882	K02111	atpA	F-type H+/Na+-transporting ATPase subunit alpha [EC:7.1.2.2 / 7.2.2.1]
KHILFOJJ_00899	K01262	pepP	Xaa-Pro aminopeptidase [EC:3.4.11.9]
KHILFOJJ_00915	K10823	oppF	oligopeptide transport system ATP-binding protein
KHILFOJJ_00916	K02031	ddpD	peptide/nickel transport system ATP-binding protein
KHILFOJJ_00917	K02034		peptide/nickel transport system permease protein
KHILFOJJ_00918	K02033		peptide/nickel transport system permease protein
KHILFOJJ_00920	K02035		peptide/nickel transport system substrate-binding protein
KHILFOJJ_00922	K01258	pepT	tripeptide aminopeptidase [EC:3.4.11.4]
KHILFOJJ_00924	K05847	opuA	osmoprotectant transport system ATP-binding protein [EC:7.6.2.9]
KHILFOJJ_00925	K05846	opuBD	osmoprotectant transport system permease protein
KHILFOJJ_00926	K05846	opuBD	osmoprotectant transport system permease protein
KHILFOJJ_00927	K05845	opuC	osmoprotectant transport system substrate-binding protein
KHILFOJJ_00934	K02035		peptide/nickel transport system substrate-binding protein
KHILFOJJ_00936	K02031	ddpD	peptide/nickel transport system ATP-binding protein
KHILFOJJ_00937	K02034		peptide/nickel transport system permease protein
KHILFOJJ_00938	K02033		peptide/nickel transport system permease protein
KHILFOJJ_00939	K02035		peptide/nickel transport system substrate-binding protein
KHILFOJJ_00968	K07260	vanY	zinc D-Ala-D-Ala carboxypeptidase [EC:3.4.17.14]
KHILFOJJ_01030	K01999	livK	branched-chain amino acid transport system substrate-binding protein
KHILFOJJ_01031	K01997	livH	branched-chain amino acid transport system permease protein
KHILFOJJ_01032	K01998	livM	branched-chain amino acid transport system permease protein
KHILFOJJ_01033	K01995	livG	branched-chain amino acid transport system ATP-binding protein
KHILFOJJ_01034	K01996	livF	branched-chain amino acid transport system ATP-binding protein
KHILFOJJ_01072	K02000	proV	glycine betaine/proline transport system ATP-binding protein [EC:7.6.2.9]
KHILFOJJ_01073	K02001	proW	glycine betaine/proline transport system permease protein
KHILFOJJ_01074	K02002	proX	glycine betaine/proline transport system substrate-binding protein
KHILFOJJ_01075	K02071	metN	D-methionine transport system ATP-binding protein
KHILFOJJ_01076	K02072	metI	D-methionine transport system permease protein
KHILFOJJ_01077	K02073	metQ	D-methionine transport system substrate-binding protein
KHILFOJJ_01091	K08641	vanX	zinc D-Ala-D-Ala dipeptidase [EC:3.4.13.22]
KHILFOJJ_01096	K07260	vanY	zinc D-Ala-D-Ala carboxypeptidase [EC:3.4.17.14]
KHILFOJJ_01107	K01620	ltaE	threonine aldolase [EC:4.1.2.48]
KHILFOJJ_01137	K02025		multiple sugar transport system permease protein
KHILFOJJ_01138	K02026		multiple sugar transport system permease protein
KHILFOJJ_01139	K02027		multiple sugar transport system substrate-binding protein
KHILFOJJ_01142	K02034		peptide/nickel transport system permease protein
KHILFOJJ_01143	K02033		peptide/nickel transport system permease protein
KHILFOJJ_01144	K10823	oppF	oligopeptide transport system ATP-binding protein
KHILFOJJ_01145	K02031	ddpD	peptide/nickel transport system ATP-binding protein
KHILFOJJ_01146	K02035		peptide/nickel transport system substrate-binding protein
KHILFOJJ_01149	K14155	patB	cysteine-S-conjugate beta-lyase [EC:4.4.1.13]
KHILFOJJ_01163	K02056		simple sugar transport system ATP-binding protein [EC:7.5.2.-]
KHILFOJJ_01164	K02057		simple sugar transport system permease protein 411
KHILFOJJ_01165	K02057		simple sugar transport system permease protein 429
KHILFOJJ_01272	K00830	agxT	alanine-glyoxylate transaminase / serine-glyoxylate transaminase / serine-pyruvate transaminase [EC:2.6.1.44 / 2.6.1.45 / 2.6.1.51]
KHILFOJJ_01273	K00830	agxT	alanine-glyoxylate transaminase / serine-glyoxylate transaminase / serine-pyruvate transaminase [EC:2.6.1.44 / 2.6.1.45 / 2.6.1.51]
KHILFOJJ_01288	K10112	msm	multiple sugar transport system ATP-binding protein
KHILFOJJ_01306	K10823	oppF	oligopeptide transport system ATP-binding protein
KHILFOJJ_01307	K02031	ddpD	peptide/nickel transport system ATP-binding protein
KHILFOJJ_01308	K02034		peptide/nickel transport system permease protein
KHILFOJJ_01309	K02033		peptide/nickel transport system permease protein
KHILFOJJ_01310	K02035		peptide/nickel transport system substrate-binding protein
KHILFOJJ_01340	K10112	msm	multiple sugar transport system ATP-binding protein
KHILFOJJ_01343	K02026		multiple sugar transport system permease protein
KHILFOJJ_01344	K02025		multiple sugar transport system permease protein
KHILFOJJ_01345	K02027		multiple sugar transport system substrate-binding protein
KHILFOJJ_01349	K01258	pepT	tripeptide aminopeptidase [EC:3.4.11.4]
KHILFOJJ_01352	K06282	hyaA	hydrogenase small subunit [EC:1.12.99.6]
KHILFOJJ_01353	K06281	hyaB	hydrogenase large subunit [EC:1.12.99.6]
KHILFOJJ_01354	K03605	hyaD	hydrogenase maturation protease [EC:3.4.23.-]
KHILFOJJ_01356	K04656	hypF	hydrogenase maturation protein HypF
KHILFOJJ_01357	K04653	hypC	hydrogenase expression/formation protein HypC
KHILFOJJ_01358	K04654	hypD	hydrogenase expression/formation protein HypD
KHILFOJJ_01359	K04655	hypE	hydrogenase expression/formation protein HypE
KHILFOJJ_01362	K01262	pepP	Xaa-Pro aminopeptidase [EC:3.4.11.9]
KHILFOJJ_01369	K02031	ddpD	peptide/nickel transport system ATP-binding protein
KHILFOJJ_01370	K02034		peptide/nickel transport system permease protein
KHILFOJJ_01371	K02033		peptide/nickel transport system permease protein
KHILFOJJ_01372	K02035		peptide/nickel transport system substrate-binding protein
KHILFOJJ_01378	K01999	livK	branched-chain amino acid transport system substrate-binding protein
KHILFOJJ_01379	K01997	livH	branched-chain amino acid transport system permease protein
KHILFOJJ_01380	K01997	livH	branched-chain amino acid transport system permease protein
KHILFOJJ_01381	K01995	livG	branched-chain amino acid transport system ATP-binding protein
KHILFOJJ_01382	K01996	livF	branched-chain amino acid transport system ATP-binding protein
KHILFOJJ_01396	K05020	opuD	glycine betaine transporter
KHILFOJJ_01471	K08303	prtC	U32 family peptidase [EC:3.4.-.-]
KHILFOJJ_01511	K01989		putative tryptophan/tyrosine transport system substrate-binding protein
KHILFOJJ_01512	K05832		putative tryptophan/tyrosine transport system permease protein
KHILFOJJ_01513	K05833		putative tryptophan/tyrosine transport system ATP-binding protein
KHILFOJJ_01524	K00625	pta	phosphate acetyltransferase [EC:2.3.1.8]
KHILFOJJ_01525	K00925	ackA	acetate kinase [EC:2.7.2.1]
KHILFOJJ_01551	K01305	iadA	beta-aspartyl-dipeptidase (metallo-type) [EC:3.4.19.-]
KHILFOJJ_01557	K01754	ilvA	threonine dehydratase [EC:4.3.1.19]
KHILFOJJ_01594	K01620	ltaE	threonine aldolase [EC:4.1.2.48]
KHILFOJJ_01595	K01270	pepD	dipeptidase D [EC:3.4.13.-]
KHILFOJJ_01672	K00812	aspB	aspartate aminotransferase [EC:2.6.1.1]
KHILFOJJ_01673	K01273	dpeP	membrane dipeptidase [EC:3.4.13.19]
KHILFOJJ_01698	K01571	oadA	oxaloacetate decarboxylase (Na+ extruding) subunit alpha [EC:7.2.4.2]
KHILFOJJ_01699	K23351	gcdC	glutaconyl-CoA/methylmalonyl-CoA decarboxylase subunit gamma
KHILFOJJ_01701	K01604	mmdA	methylmalonyl-CoA decarboxylase subunit alpha [EC:7.2.4.3]
KHILFOJJ_01704	K07258	dacC	serine-type D-Ala-D-Ala carboxypeptidase (penicillin-binding protein 5/6) [EC:3.4.16.4]
KHILFOJJ_01800	K01255	pepA	leucyl aminopeptidase [EC:3.4.11.1]
KHILFOJJ_01803	K02031	ddpD	peptide/nickel transport system ATP-binding protein
KHILFOJJ_01804	K02034		peptide/nickel transport system permease protein
KHILFOJJ_01805	K02033		peptide/nickel transport system permease protein
KHILFOJJ_01806	K02035		peptide/nickel transport system substrate-binding protein
KHILFOJJ_01820	K08303	prtC	U32 family peptidase [EC:3.4.-.-]
KHILFOJJ_01859	K02035		peptide/nickel transport system substrate-binding protein
KHILFOJJ_01876	K01267		aspartyl aminopeptidase [EC:3.4.11.21]
KHILFOJJ_01880	K02120	ntpD	V/A-type H+/Na+-transporting ATPase subunit D
KHILFOJJ_01881	K02118	ntpB	V/A-type H+/Na+-transporting ATPase subunit B
KHILFOJJ_01882	K02117	ntpA	V/A-type H+/Na+-transporting ATPase subunit A [EC:7.1.2.2 7.2.2.1]
KHILFOJJ_01884	K02122	ntpF	V/A-type H+/Na+-transporting ATPase subunit F
KHILFOJJ_01885	K02124	ntpK	V/A-type H+/Na+-transporting ATPase subunit K
KHILFOJJ_01886	K02123	ntpI	V/A-type H+/Na+-transporting ATPase subunit I
KHILFOJJ_01887	K02119	ntpC	V/A-type H+/Na+-transporting ATPase subunit C
KHILFOJJ_01927	K01914	asnA	aspartate--ammonia ligase [EC:6.3.1.1]
KHILFOJJ_01934	K07258	dacC	serine-type D-Ala-D-Ala carboxypeptidase (penicillin-binding protein 5/6) [EC:3.4.16.4]
KHILFOJJ_02049	K00634	ptb	phosphate butyryltransferase [EC:2.3.1.19]
KHILFOJJ_02051	K00929	buk	butyrate kinase [EC:2.7.2.7]
KHILFOJJ_02054	K15580	oppA	oligopeptide transport system substrate-binding protein
KHILFOJJ_02055	K15581	oppB	oligopeptide transport system permease protein
KHILFOJJ_02056	K15582	oppC	oligopeptide transport system permease protein
KHILFOJJ_02057	K15583	oppD	oligopeptide transport system ATP-binding protein
KHILFOJJ_02058	K10823		oligopeptide transport system ATP-binding protein
KHILFOJJ_02141	K15986	ppaC	manganese-dependent inorganic pyrophosphatase [EC:3.6.1.1]
KHILFOJJ_02181	K07258	dacC	serine-type D-Ala-D-Ala carboxypeptidase (penicillin-binding protein 5/6) [EC:3.4.16.4]
KHILFOJJ_02209	K02031	ddpD	peptide/nickel transport system ATP-binding protein
KHILFOJJ_02210	K02034		peptide/nickel transport system permease protein
KHILFOJJ_02211	K02033		peptide/nickel transport system permease protein
KHILFOJJ_02212	K02035		peptide/nickel transport system substrate-binding protein
KHILFOJJ_02270	K00278	nadB	L-aspartate oxidase [EC:1.4.3.16]
KHILFOJJ_02278	K02031	ddpB	peptide/nickel transport system ATP-binding protein
KHILFOJJ_02279	K02034		peptide/nickel transport system permease protein
KHILFOJJ_02280	K02033		peptide/nickel transport system permease protein
KHILFOJJ_02283	K01273		membrane dipeptidase [EC:3.4.13.19]
KHILFOJJ_02291	K01989		putative tryptophan/tyrosine transport system substrate-binding protein
KHILFOJJ_02292	K05832		putative tryptophan/tyrosine transport system permease protein
KHILFOJJ_02293	K05833		putative tryptophan/tyrosine transport system ATP-binding protein
KHILFOJJ_02325	K02031	ddpD	peptide/nickel transport system ATP-binding protein
KHILFOJJ_02326	K02034		peptide/nickel transport system permease protein
KHILFOJJ_02327	K02033		peptide/nickel transport system permease protein
KHILFOJJ_02328	K02035		peptide/nickel transport system substrate-binding protein
KHILFOJJ_02510	K00600	glyA	glycine hydroxymethyltransferase [EC:2.1.2.1]
KHILFOJJ_02529	K00382	lpd	dihydrolipoamide dehydrogenase [EC:1.8.1.4]
KHILFOJJ_02530	K03800	lplA	lipoate-protein ligase [EC:6.3.1.20]
KHILFOJJ_02531	K00283	gcvPB	glycine dehydrogenase subunit 2 [EC:1.4.4.2]
KHILFOJJ_02532	K00282	gcvPA	glycine dehydrogenase subunit 1 [EC:1.4.4.2]
KHILFOJJ_02533	K02437	gcvH	glycine cleavage system H protein
KHILFOJJ_02534	K00605	gcvT	aminomethyltransferase [EC:2.1.2.10]
KHILFOJJ_02595	K00625	pta	phosphate acetyltransferase [EC:2.3.1.8]
KHILFOJJ_02596	K00929	buk	butyrate kinase [EC:2.7.2.7]
KHILFOJJ_02620	K01938	fhs	formate--tetrahydrofolate ligase [EC:6.3.4.3]
KHILFOJJ_02674	K01265	map	methionyl aminopeptidase [EC:3.4.11.18]
KHILFOJJ_02713	K01266	dmpA	D-aminopeptidase [EC:3.4.11.19]
KHILFOJJ_02719	K10440	rbsC	ribose transport system permease protein
KHILFOJJ_02720	K10441	rbsA	ribose transport system ATP-binding protein [EC:7.5.2.7]
KHILFOJJ_02721	K10439	rbsB	ribose transport system substrate-binding protein
KHILFOJJ_02724	K01596	pckA	phosphoenolpyruvate carboxykinase (GTP) [EC:4.1.1.32]
KHILFOJJ_02730	K00600	glyA	glycine hydroxymethyltransferase [EC:2.1.2.1]
KHILFOJJ_02733	K01996	livF	branched-chain amino acid transport system ATP-binding protein
KHILFOJJ_02734	K01995	livG	branched-chain amino acid transport system ATP-binding protein
KHILFOJJ_02735	K01998	livM	branched-chain amino acid transport system permease protein
KHILFOJJ_02736	K01997	livH	branched-chain amino acid transport system permease protein
KHILFOJJ_02737	K01999	livK	branched-chain amino acid transport system substrate-binding protein
KHILFOJJ_02754	K10823	oppF	oligopeptide transport system ATP-binding protein
KHILFOJJ_02755	K15583	oppD	oligopeptide transport system ATP-binding protein
KHILFOJJ_02756	K15582	oppC	oligopeptide transport system permease protein
KHILFOJJ_02757	K15581	oppB	oligopeptide transport system permease protein
KHILFOJJ_02758	K15580	oppA	oligopeptide transport system substrate-binding protein
KHILFOJJ_02764	K00283	gcvPB	glycine dehydrogenase subunit 2 [EC:1.4.4.2]
KHILFOJJ_02765	K00282	gcvPA	glycine dehydrogenase subunit 1 [EC:1.4.4.2]
KHILFOJJ_02770	K02027		multiple sugar transport system substrate-binding protein
KHILFOJJ_02773	K02035		peptide/nickel transport system substrate-binding protein
KHILFOJJ_02775	K02031	ddpD	peptide/nickel transport system ATP-binding protein
KHILFOJJ_02776	K02034		peptide/nickel transport system ATP-binding protein
KHILFOJJ_02777	K02033		peptide/nickel transport system permease protein
KHILFOJJ_02780	K02073	metQ	D-methionine transport system substrate-binding protein
KHILFOJJ_02781	K02072	metI	D-methionine transport system substrate-binding protein
KHILFOJJ_02782	K02071	metN	D-methionine transport system permease protein
KHILFOJJ_02785	K10671	grdE	glycine reductase complex component B subunit gamma [EC:1.21.4.2]
KHILFOJJ_02927	K00027	maeA	branched-chain amino acid:cation transporter, LIVCS family
KHILFOJJ_02941	K16203	dppA1	malate dehydrogenase (oxaloacetate-decarboxylating) [EC:1.1.1.38]
KHILFOJJ_03050	K00929	buk	D-amino peptidase [EC:3.4.11.-]
KHILFOJJ_03051	K00634	ptb	butyrate kinase [EC:2.7.2.7]
KHILFOJJ_03079	K00100	bdhAB	phosphate butyryltransferase [EC:2.3.1.19]
KHILFOJJ_03083	K21583	grdG	glycine reductase complex component B subunit gamma [EC:1.21.4.2]
KHILFOJJ_03154	K10672	grdB	sarcosine reductase complex component B subunit alpha [EC:1.21.4.3]
KHILFOJJ_03155	K10671	grdE	glycine reductase complex component B subunit gamma [EC:1.21.4.2]
